# Supplementary material
Source: PubMed Central journal article supplement (PMC3370610)
Supplement: supp_194.11.2854_FigS1-S4_TableS1-S2.pdf [file supp_194.11.2854_FigS1-S4_TableS1-S2.pdf]

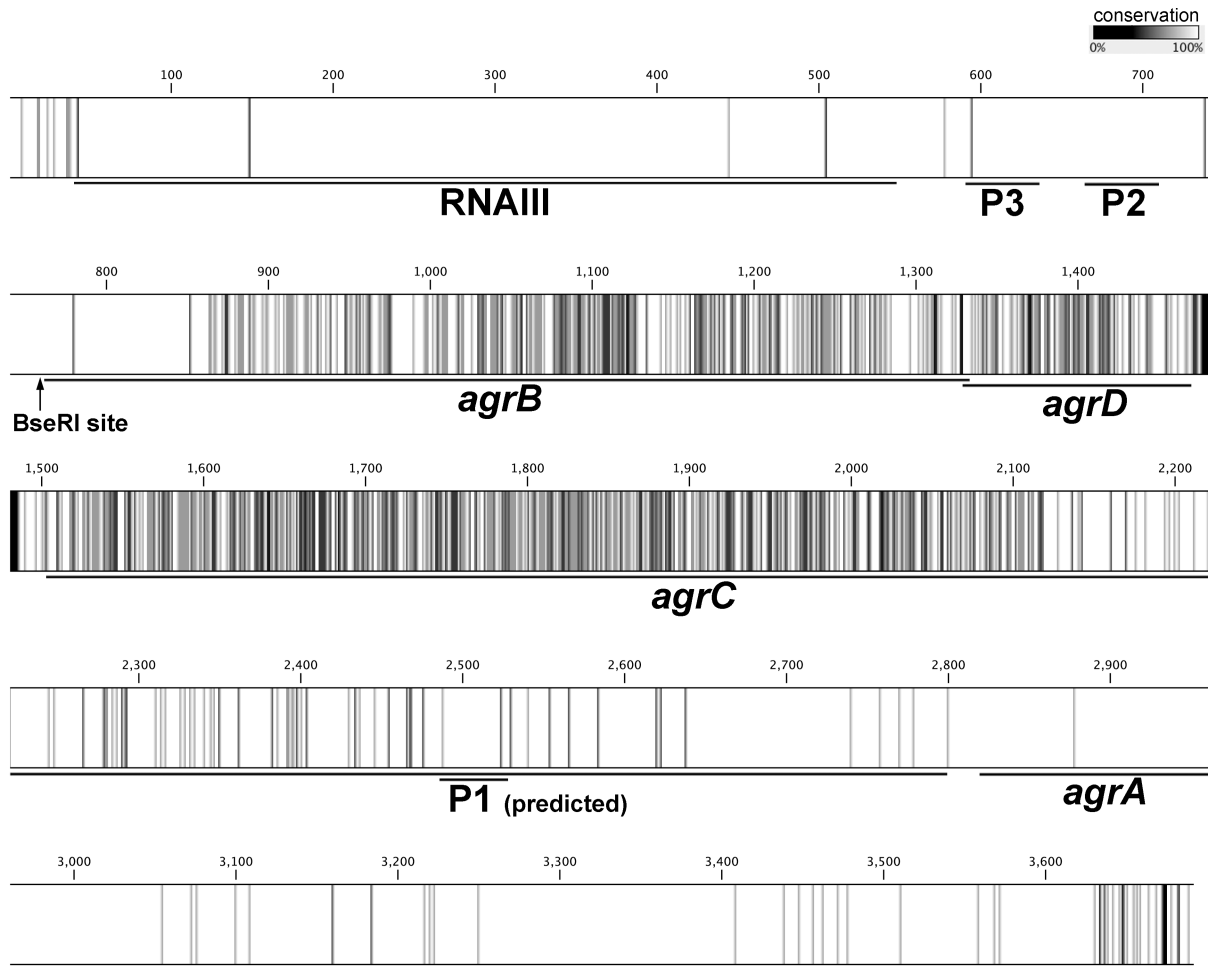

**Figure S1. Sequence conservation among the four *S. aureus agr* alleles.** Nucleotide sequences of the four *agr* alleles cloned in this study (*S. aureus agr*-I, -II, -III, and -IV) were aligned with CLC Sequence Viewer and conservation score was plotted via grayscale bars. Genes, promoters, and the BseRI restriction site referred to in the text are indicated; the *agrC* and *agrA* coding regions extend onto two lines. A segment known as the hypervariable region encompasses the 3' variable part of *agrB*, *agrD*, and the 5' variable region of *agrC*. The location of the *agr* P1 promoter was predicted with BPROM (Softberry) using the DNA sequence of the RsaI-PvuII fragment of the *agr* locus, also known as “A8,” which was shown to contain weak, constitutive promoter activity in previous gene fusion experiments (12); predicted -10 box, *tggtattat*; predicted -35 box, *tcgatt*.

**A**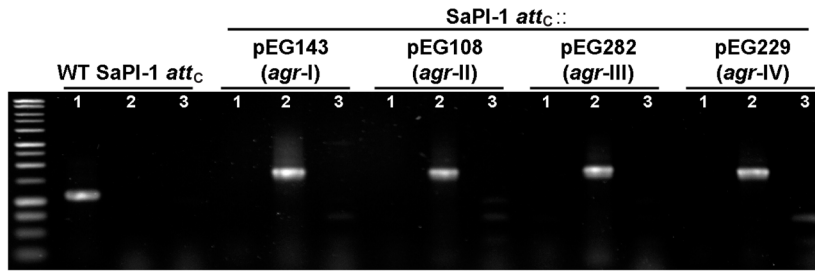**B**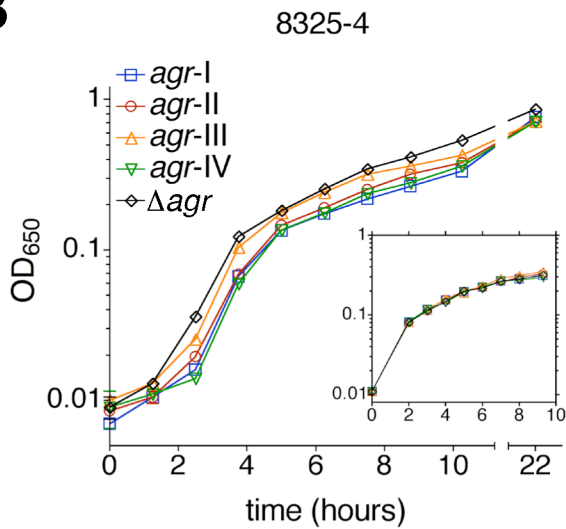**C**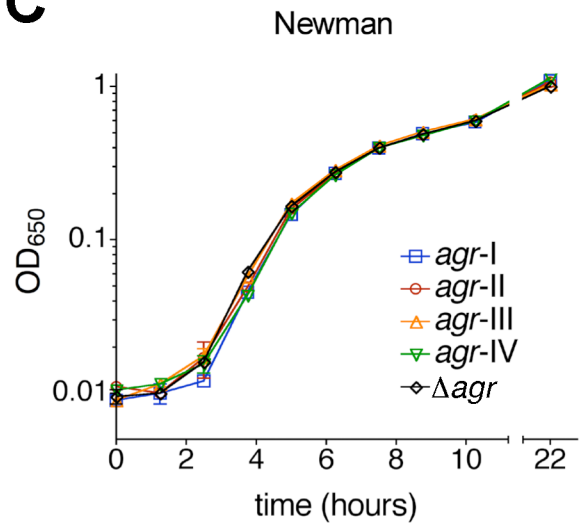

**Figure S2. PCR analysis and growth of congenic *S. aureus* strains.** A. PCR determination of locus orientation. DNA was extracted from 8325-4 derivatives containing the indicated *agr* construct, and amplified using the indicated primers flanking the SaPI-1 *att<sub>C</sub>* site or extending out from the *agr* locus. Primer combinations: 1, *att<sub>C</sub>*-F + *att<sub>C</sub>*-R; 2, *att<sub>C</sub>*-F + *agr*-out; 3, *att<sub>C</sub>*-R + *agr*-out. B, C. Growth in liquid culture. Cells containing the indicated *agr* allele were grown in CYGP media without glucose overnight and subcultured at a 1:200 dilution into fresh media. Growth was monitored via optical density as described in the text. B, Inset. After subculture cells were grown to OD<sub>650</sub> 0.05 (corresponding to approximately 2 hours), then diluted down 5-fold in fresh media, representing time point zero.

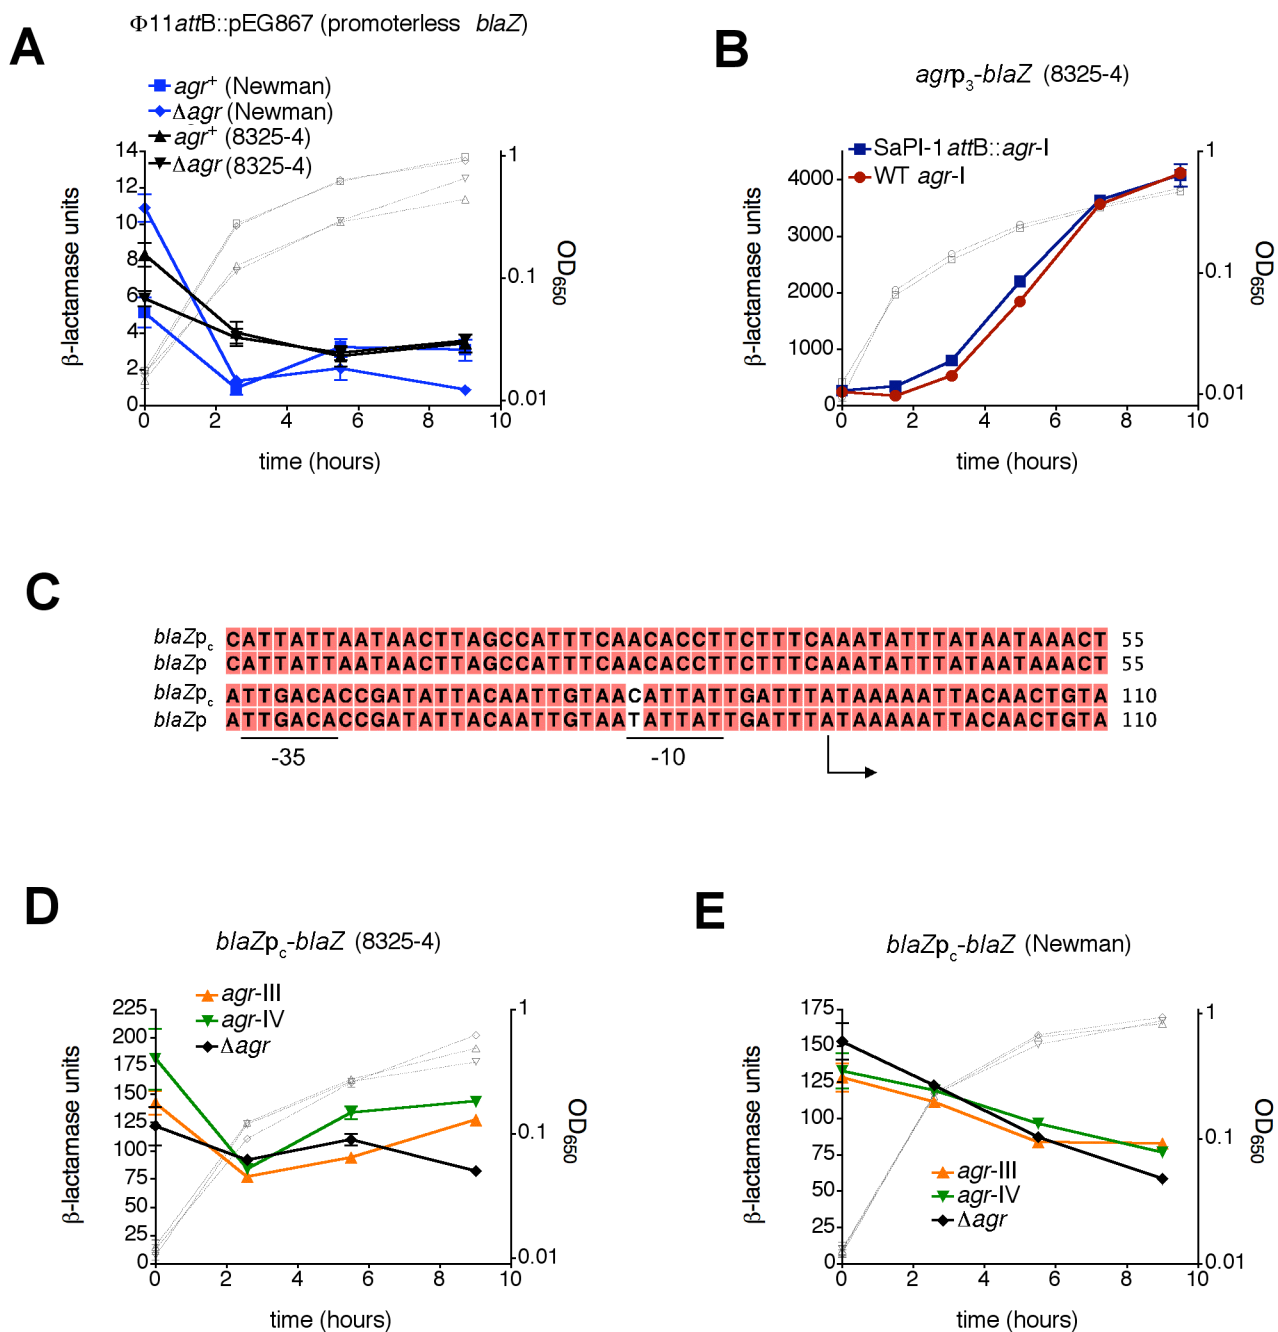

**Figure S3. Tests of transcription from the  $\phi 11 att_B$  site and from the *blaZp<sub>c</sub>* promoter.** A. Congenic *agr*<sup>+</sup> or  $\Delta$ *agr* strains of the indicated background containing a promoterless *blaZ* gene within the  $\phi 11 att_B$  site were assayed for  $\beta$ -lactamase activity as described in the text. B. *S. aureus* cells containing *agr-I* at its native site (WT) or expressed from pEG143 within the SaPI-1 *att<sub>C</sub>* site were assayed for  $\beta$ -lactamase activity as described. C. Alignment of the promoter regions from *blaZp* (14) and a stable constitutive mutant, *blaZp<sub>c</sub>*, derived from this promoter. -35, -10, and start sites (14) are indicated. D, E. Congenic strains of the 8325-4 (D) or Newman (E) background containing the indicated *agr* allele and a plasmid-carried *blaZp<sub>c</sub>*-*blaZ* reporter (pEG832) were assayed for  $\beta$ -lactamase activity as described in the text. Assay data are presented as  $\beta$ -lactamase units  $\pm$  SEM (closed symbols, left axis), and growth as optical density measurements (grey open symbols, right axis).

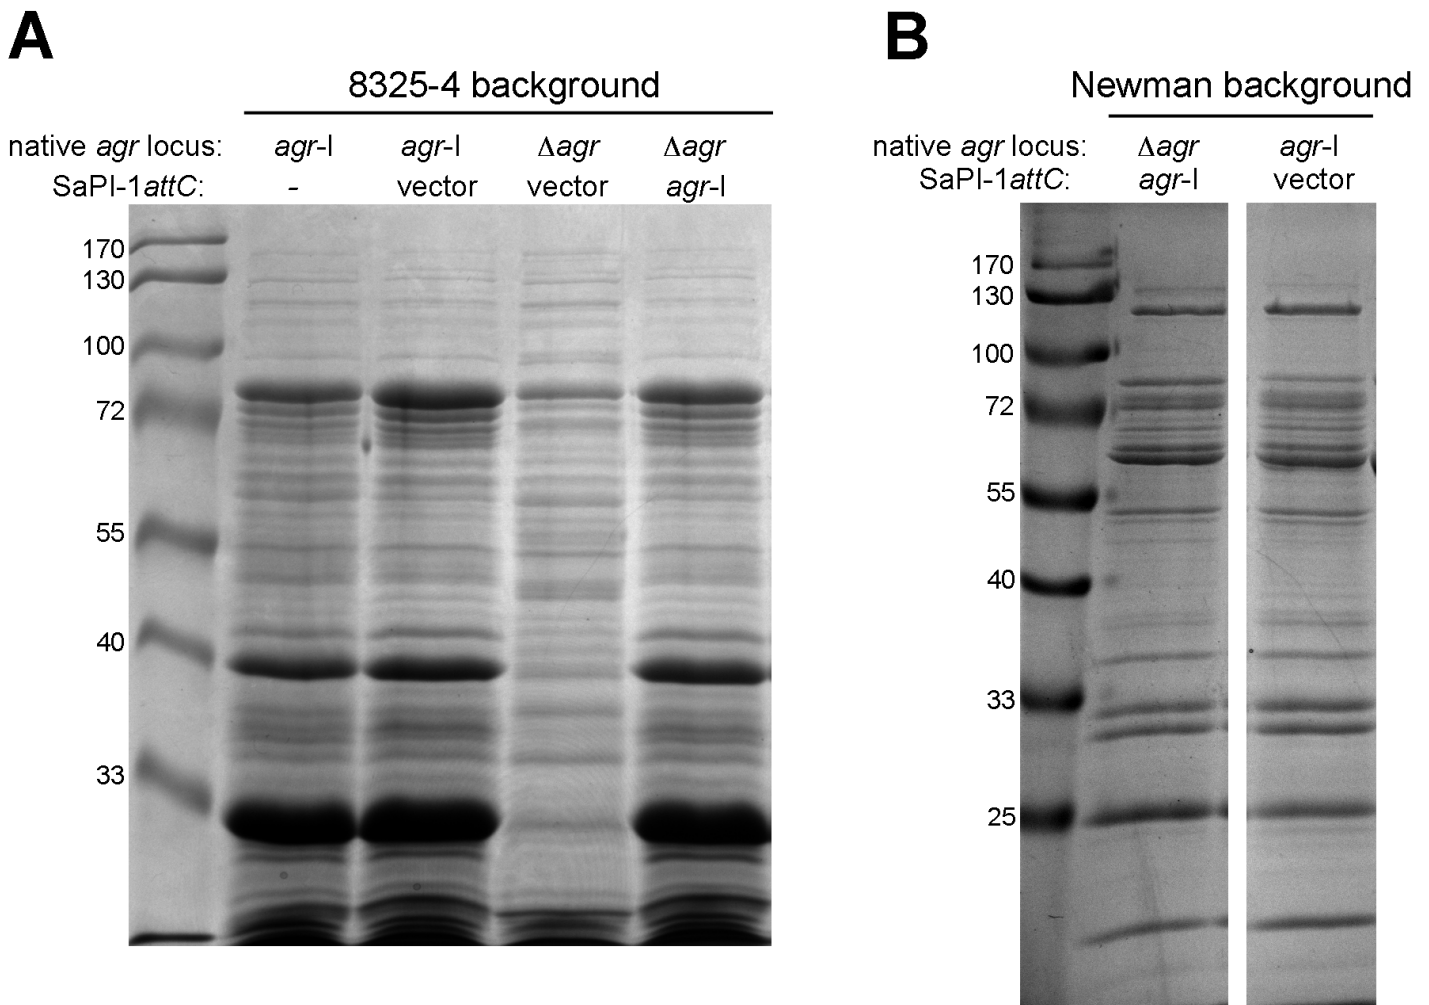

**Figure S4. Comparison of exoproteins isolated from *S. aureus* strains with the *agr* operon in its native or heterologous location.** Culture supernatants were collected after growth to post-exponential phase and exoproteins were isolated, separated via SDS-PAGE, and stained with Coomassie dye. A, 8325-4 strains. Lane 1, RN6734 (native *agr*-I); lane 2, EG180 (native *agr*-I, SaPI-1 *attC*::vector alone); lane 3, EG248 (native *agr*, SaPI-1 *attC*::vector alone); lane 4, EG170 (native *agr*, SaPI-1 *attC*::*agr*-I). B, Newman strains. Lane 1, EG802 (native *agr*, SaPI-1 *attC*::*agr*-I); lane 2 (same gel), EG806 (native *agr*-I, SaPI-1 *attC*::vector alone).

**Table S1. Strains and plasmids.**

| Strain or plasmid               | Genotype or description                                                                       | Reference       |
|---------------------------------|-----------------------------------------------------------------------------------------------|-----------------|
| <b><i>S. aureus</i> strains</b> |                                                                                               |                 |
| RN6734                          | <i>agr</i> group I prototype, derivative of NTCT8325-4                                        | (11)            |
| RN7206                          | <i>agr</i> group I prototype, derivative of NTCT8325-4 $\Delta$ <i>agr::tetM</i>              | (11)            |
| RN4220                          | Restriction-deficient mutant of NTCT8325-4                                                    | (2)             |
| RN10149                         | Strain Newman, <i>agr</i> group I                                                             | (3)             |
| HF6122                          | RN10149 $\Delta$ <i>agr::tetM</i>                                                             | This work       |
| RN6607                          | <i>agr</i> group II prototype                                                                 | (8)             |
| RN3984                          | <i>agr</i> group III prototype                                                                | (9, 11)         |
| RN4850                          | <i>agr</i> group IV prototype                                                                 | (7)             |
| RN9011                          | RN4220 with pRN7023                                                                           | (5)             |
| RN11679                         | RN4220 with pTL2787                                                                           | (10); This work |
| EG170                           | RN7206 SaPI-1 <i>attC</i> ::pEG143 (congenic <i>agr</i> -I, 8325-4)                           | This work       |
| EG133                           | RN7206 SaPI-1 <i>attC</i> ::pEG108 (congenic <i>agr</i> -II, 8325-4)                          | This work       |
| EG292                           | RN7206 SaPI-1 <i>attC</i> ::pEG282 (congenic <i>agr</i> -III, 8325-4)                         | This work       |
| EG248                           | RN7206 SaPI-1 <i>attC</i> ::pEG229 (congenic <i>agr</i> -IV, 8325-4)                          | This work       |
| EG248                           | RN7206 SaPI-1 <i>attC</i> ::pJC1111 (congenic <i>agr</i> <sup>r</sup> , 8325-4)               | This work       |
| EG180                           | RN6734 SaPI-1 <i>attC</i> ::pJC1111 (vector alone, 8325-4)                                    | This work       |
| EG802                           | HF6122 SaPI-1 <i>attC</i> ::pEG143 (congenic <i>agr</i> -I, Newman)                           | This work       |
| EG803                           | HF6122 SaPI-1 <i>attC</i> ::pEG108 (congenic <i>agr</i> -II, Newman)                          | This work       |
| EG804                           | HF6122 SaPI-1 <i>attC</i> ::pEG282 (congenic <i>agr</i> -III, Newman)                         | This work       |
| EG805                           | HF6122 SaPI-1 <i>attC</i> ::pEG229 (congenic <i>agr</i> -IV, Newman)                          | This work       |
| EG801                           | HF6122 SaPI-1 <i>attC</i> ::pJC1111 (congenic <i>agr</i> <sup>r</sup> , Newman)               | This work       |
| EG806                           | RN10149 SaPI-1 <i>attC</i> ::pJC1111 (vector alone, Newman)                                   | This work       |
| <b><i>E. coli</i> strains</b>   |                                                                                               |                 |
| DH5 $\alpha$                    | Standard recipient for plasmid cloning                                                        | Promega         |
| <b>Plasmids</b>                 |                                                                                               |                 |
| pJC1111                         | Shuttle/suicide vector (Cd <sup>R</sup> ) containing SaPI-1 <i>atts</i>                       | (5)             |
| pEG143                          | pJC1111 containing <i>agr</i> -I                                                              | This work       |
| pEG108                          | pJC1111 containing <i>agr</i> -II                                                             | This work       |
| pEG282                          | pJC1111 containing <i>agr</i> -III                                                            | This work       |
| pEG229                          | pJC1111 containing <i>agr</i> -IV                                                             | This work       |
| pEG858                          | pJC1111 containing <i>agr</i> -III-IV chimera                                                 | This work       |
| pEG859                          | pJC1111 containing <i>agr</i> -III-I chimera                                                  | This work       |
| pEG860                          | pJC1111 containing <i>agr</i> -IV-III chimera                                                 | This work       |
| pEG861                          | pJC1111 containing <i>agr</i> -I-III chimera                                                  | This work       |
| pEG924                          | pJC1111 containing <i>agr</i> -II-IV chimera                                                  | This work       |
| pEG925                          | pJC1111 containing <i>agr</i> -IV-II chimera                                                  | This work       |
| pRN7023                         | Shuttle vector (Cm <sup>R</sup> ) containing SaPI-1 <i>int</i>                                | (13)            |
| pEG813                          | Shuttle/suicide vector (Em <sup>R</sup> ) containing $\phi$ 11 <i>attP</i>                    | This work       |
| pCN41                           | Shuttle vector (Em <sup>R</sup> ) containing promoterless <i>blaZ</i>                         | (1)             |
| pEG867                          | pEG813 containing promoterless <i>blaZ</i>                                                    | This work       |
| pEG835                          | pEG813 containing <i>agr</i> p3- <i>blaZ</i> fusion                                           | This work       |
| pTL2787                         | Shuttle vector (Cm <sup>R</sup> ) containing $\phi$ 11 <i>int</i>                             | (10)            |
| pEG832                          | pCN41 containing <i>blaZ</i> <sub>pC</sub> - <i>blaZ</i>                                      | This work       |
| pRN9162                         | Shuttle vector (Em <sup>R</sup> ) containing <i>rot</i> - <i>blaZ</i> translational fusion    | (4)             |
| pJC1122                         | pUC18 containing <i>blaZ</i> <sub>pC</sub>                                                    | This work       |
| pJC1280                         | pCN41(Cm <sup>R</sup> )                                                                       | This work       |
| pJC1435                         | pJC1280 containing <i>tstp</i> - <i>blaZ</i> transcriptional fusion                           | This work       |
| pJC1287                         | pJC1280 containing <i>lukSF</i> -PVp- <i>blaZ</i> transcriptional fusion                      | This work       |
| pJC1295                         | pJC1280 containing <i>hlap</i> - <i>blaZ</i> transcriptional fusion                           | This work       |
| pRN6788                         | Shuttle vector (Cm <sup>R</sup> ) containing <i>spap</i> - <i>blaZ</i> transcriptional fusion | (6)             |

**Table S2. Oligonucleotide primers.**

| Primer name                | Sequence (5' – 3'; restriction site underlined) | RE site |
|----------------------------|-------------------------------------------------|---------|
| agrII-F                    | GATAACTCAGTAAGAATCCATTTCGCCCTTTGC               |         |
| agrII-R                    | TTGCGCCATAGGATTGTAGAGTGAAATAG                   |         |
| agrIII-F                   | AGATAACTCAGTAAGAACCAGTTTCGCCCTTAGC              |         |
| agrIII-R                   | GCGAGCAAATAAGATTTATTGGGTAGGATATTGTAGC           |         |
| agrIV-F1                   | CATTAGACTTATTCATAAATTTAACGGTGGATCTC             |         |
| agrIV-R                    | GTAAAAATTGCGCCATAGGATTGTAGAGTGAAATAG            |         |
| SaPI-1 att <sub>c</sub> -F | GCTGCGGTAATGGAAAC                               |         |
| SaPI-1 att <sub>c</sub> -R | CCATAATAAATGCCTCCTCG                            |         |
| agr-out                    | GCAATGCACTGTATAGCTGGC                           |         |
| p11att-F                   | TTTTGGGCCCTCTGGAATTAATGAGGCATTCTAAC             | Apal    |
| p11att-R                   | ATCCCCTAGGATCGATCCCCACACAACCAAC                 | AvrII   |
| Pbla-F                     | ATATAAGCATGCAGCTTACTATGCCATTATT                 | SphI    |
| blaZtt-R                   | AACAGTGGCGCCTGTCACCTTTGCTTGATATATGAG            | NarI    |
| Phla-F                     | GGTACCAGTCAGTGTATGGATG                          | KpnI    |
| Phla-R                     | GAATTCATTTTCATCATCCTTC                          | EcoRI   |
| Ppvl-F                     | GGTACCGCGACAGGAGAGGTAG                          | KpnI    |
| Ppvl-R                     | GAATTCATAAATCATTTCCTTTCTTTATAAATTTTATTAC        | EcoRI   |
| Ptst-F                     | GGTACCACCACTAGAAAGTGAC                          | KpnI    |
| Ptst-R                     | GAATTCATTTTAATTCTCCTTACTTCAAATGTGTAAACG         | EcoRI   |

## References for Supplemental Materials

1. **Charpentier, E., A. I. Anton, P. Barry, B. Alfonso, Y. Fang, and R. P. Novick.** 2004. Novel cassette-based shuttle vector system for gram-positive bacteria. *Appl Environ Microbiol* **70**:6076-6085.
2. **de Azavedo, J. C., T. J. Foster, P. J. Hartigan, J. P. Arbuthnott, M. O'Reilly, B. N. Kreiswirth, and R. P. Novick.** 1985. Expression of the cloned toxic shock syndrome toxin 1 gene (*tst*) in vivo with a rabbit uterine model. *Infect Immun* **50**:304-309.
3. **Duthie, E. S., and L. L. Lorenz.** 1952. Staphylococcal coagulase; mode of action and antigenicity. *J Gen Microbiol* **6**:95-107.
4. **Geisinger, E., R. P. Adhikari, R. Jin, H. F. Ross, and R. P. Novick.** 2006. Inhibition of *rot* translation by RNAIII, a key feature of *agr* function. *Mol Microbiol* **61**:1038-1048.
5. **Geisinger, E., E. A. George, T. W. Muir, and R. P. Novick.** 2008. Identification of ligand specificity determinants in AgrC, the *Staphylococcus aureus* quorum-sensing receptor. *J Biol Chem* **283**:8930-8938.
6. **Herbert, S., P. Barry, and R. P. Novick.** 2001. Subinhibitory clindamycin differentially inhibits transcription of exoprotein genes in *Staphylococcus aureus*. *Infect Immun* **69**:2996-3003.
7. **Jarraud, S., G. J. Lyon, A. M. Figueiredo, L. Gerard, F. Vandenesch, J. Etienne, T. W. Muir, and R. P. Novick.** 2000. Exfoliatin-producing strains define a fourth *agr* specificity group in *Staphylococcus aureus*. *J Bacteriol* **182**:6517-6522.
8. **Ji, G., R. Beavis, and R. P. Novick.** 1997. Bacterial interference caused by autoinducing peptide variants. *Science* **276**:2027-2030.
9. **Kreiswirth, B. N., R. P. Novick, P. M. Schlievert, and M. Bergdoll.** 1982. Genetic studies on Staphylococcal strains from patients with toxic shock syndrome. *Ann Intern Med* **96**:974-977.
10. **Luong, T. T., and C. Y. Lee.** 2007. Improved single-copy integration vectors for *Staphylococcus aureus*. *J Microbiol Methods* **70**:186-190.
11. **Novick, R. P., H. F. Ross, S. J. Projan, J. Kornblum, B. Kreiswirth, and S. Moghazeh.** 1993. Synthesis of staphylococcal virulence factors is controlled by a regulatory RNA molecule. *Embo J* **12**:3967-3975.
12. **Peng, H. L., R. P. Novick, B. Kreiswirth, J. Kornblum, and P. Schlievert.** 1988. Cloning, characterization, and sequencing of an accessory gene regulator (*agr*) in *Staphylococcus aureus*. *J Bacteriol* **170**:4365-4372.
13. **Ruzin, A., J. Lindsay, and R. P. Novick.** 2001. Molecular genetics of SaPI1 - a mobile pathogenicity island in *Staphylococcus aureus*. *Mol Microbiol* **41**:365-377.
14. **Wang, P. Z., and R. P. Novick.** 1987. Nucleotide sequence and expression of the beta-lactamase gene from *Staphylococcus aureus* plasmid p1258 in *Escherichia coli*, *Bacillus subtilis*, and *Staphylococcus aureus*. *J Bacteriol* **169**:1763-1766.
